# Supplementary material for: The Composition, Diversity and Predictive Metabolic Profiles of Bacteria Associated With the Gut Digesta of Five Sea Urchins in Luhuitou Fringing Reef (Northern South China Sea)
Source: Front Microbiol. 2019 May 28;10:1168. doi: 10.3389/fmicb.2019.01168 (PMC6546719; doi:10.3389/fmicb.2019.01168)
Supplement: TABLE S1 — The specific value of sobs, Shannon, Simpson, ace, Chao, and coverage of each sample. [file Table_1.XLSX]

## Sheet: sheet1
	Sample\Estimators	sobs	shannon	simpson	ace	chao	coverage
D. savignyi	G5	575	2.27065	0.23335	219.289	224	0.995692
	G3	431	1.93792	0.327469	198.396	201	0.997559
	G1	457	2.31013	0.238299	272.403	225	0.997956
	G2	443	2.09737	0.281091	166.517	164.312	0.997817
D.setosum	M8	694	2.66326	0.173834	249.375	258	0.996427
	M3	344	1.72943	0.359362	182.121	171.476	0.997776
	M7	310	1.82221	0.321183	209.275	175.316	0.997582
	M10	268	1.61035	0.320451	173.544	200.143	0.997434
	M5	620	2.41613	0.188544	232.659	223.276	0.995414
	M4	632	2.34458	0.220535	240.743	246.048	0.996107
	M2	446	1.97168	0.27936	188.503	197.867	0.99745
E. calamaris	W1	337	2.20412	0.222921	171.66	176.75	0.998387
	W5	409	2.10304	0.244722	170.048	157.24	0.997667
	W2	301	2.15854	0.208623	140.826	134.143	0.998317
	W3	501	2.18295	0.222104	196.741	194.333	0.996951
	W4	344	2.1174	0.231123	190.192	169.714	0.998261
S. variolaris	K2	404	2.22183	0.231138	163.895	168	0.998522
	K3	401	2.15411	0.235889	178.13	187.667	0.997472
	K5	403	2.27539	0.206243	157.629	149.647	0.998447
	K1	264	1.70643	0.354845	153.606	127.5	0.998711
T. gratilla	B15	812	3.28639	0.081777	271.389	263.2	0.995915
	B10	634	2.87456	0.110073	247.29	242.4	0.995631
	B18	690	3.6603	0.05517	247.602	249	0.998808
	B16	658	2.95821	0.094548	253.204	242.935	0.996186
	B17	737	2.99207	0.116304	270.313	264.778	0.995954
	B11	662	3.08476	0.076182	280.955	269.676	0.995601
	B12	854	3.54535	0.050979	295.467	293.107	0.996876
	B4	620	2.62647	0.152252	224.526	223.64	0.995751
	B5	640	3.35994	0.053928	236.997	254.938	0.995995
	B6	626	3.2137	0.070961	237.6	240	0.996634
	B3	795	3.10213	0.086663	281.063	290.143	0.996313
	B2	791	3.1564	0.091621	261.796	263.217	0.996103
	B8	670	2.89398	0.111311	258.432	258	0.995729
	B1	782	2.9436	0.115914	257.123	254.231	0.996588
	B9	655	2.93198	0.125778	296.167	289.357	0.995723
	B14	609	2.58486	0.16662	275.34	228.781	0.995207
	B7	602	2.9711	0.118673	215.159	219.333	0.996478
	B20	715	2.95453	0.109059	255.111	261.435	0.99557
	B13	608	2.5226	0.179875	233.662	233.048	0.995572
	B21	654	3.53963	0.051889	263.248	282.667	0.994371
